# Supplementary material for: Core–shell magnetic mesoporous N-doped silica nanoparticles: solid base catalysts for the preparation of some arylpyrimido[4,5-b]quinoline diones under green conditions
Source: Royal Society of Chemistry journal article supplement (doi:10.1039/d0ra06546c), 2020-01-01
Supplement: d0ra06546c2.pdf [file d0ra06546c2.pdf]

## Core-shell magnetic mesoporous *N*-doped silica nanoparticles: a solid base catalyst for the preparation of some arylpyrimido[4,5-*b*]quinoline diones under green conditions

Shekofeh Neamani<sup>a</sup>, Leila Moradi\*<sup>a</sup>, Mingxuan Sun<sup>b</sup>

<sup>a</sup> Department of Organic Chemistry, Faculty of Chemistry, University of Kashan, P.O. Box 8731753153, Kashan, I.R.Iran, (Email: [L\\_moradi@kashanu.ac.ir](mailto:L_moradi@kashanu.ac.ir))

<sup>b</sup> School of Materials Engineering, Shanghai University of Engineering Science, China

### 7-methoxy-5-(3-nitrophenyl)pyrimido[4,5-*b*]quinolin- 2,4 (1H, 3H, 5H, 10H) dione (4a)

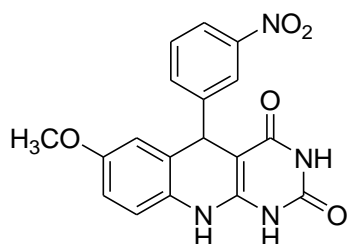

White solid, mp: 234-238°C [24]. IR (KBr) ( $\nu_{\max}/\text{cm}^{-1}$ ): 3430, 3321, 2923, 1692, 1525, 1383, and 1248. <sup>1</sup>H NMR (DMSO-*d*<sub>6</sub>, 400 MHz):  $\delta$  (ppm): 10.49 (m, 3H, N-H), 7.27 (s, 1H, Ar-H), 6.90-6.92 (d, *J*= 8 Hz, 1H, Ar-H), 6.83-6.85 (d, *J*= 8 Hz, 1H, Ar-H), 3.58 (s, 3H, OCH<sub>3</sub>).

### 7-methoxy-5-(4-chlorophenyl)pyrimido[4,5-*b*]quinolin- 2,4 (1H, 3H, 5H, 10H) dione (4b)

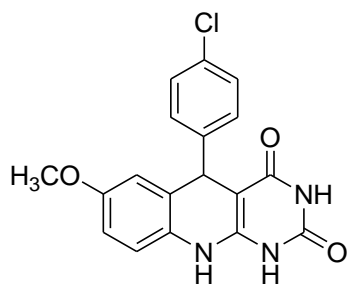

Cream solid, mp: 180-184°C. IR (KBr) ( $\nu_{\max}/\text{cm}^{-1}$ ): 3428, 3311, 2917, 1722, 1690, 1380, and 1241. <sup>1</sup>H NMR (DMSO-*d*<sub>6</sub>, 400 MHz):  $\delta$  (ppm): 10.33-10.54 (m, 3H, N-H), 7.44-7.46 (m, *J*= 8 Hz, 2H, Ar-H), 7.21-7.26 (m, 3H, Ar-H), 6.86-6.90 (d, *J*=12 Hz, 1H, Ar-H), 6.79-6.81 (d, *J*= 8 Hz, 1H, Ar-H), 6.10 (s, 1H), 3.57 (s, 3H, CH<sub>3</sub>), <sup>13</sup>CNMR (DMSO-*d*<sub>6</sub>, 100 MHz):  $\delta$  (ppm): 170.46, 166.124, 155.38, 153.72,

133.98, 132.48, 130.97, 130.77, 129.28, 129.19, 128.58, 126.91, 116.77, 114.82, 114.38, 113.10, 55.66, 44.19.

**7-methoxy-5-(2-chlorophenyl)pyrimido[4,5-*b*] quinolin- 2,4 (1H, 3H, 5H, 10H) dione (4c)**

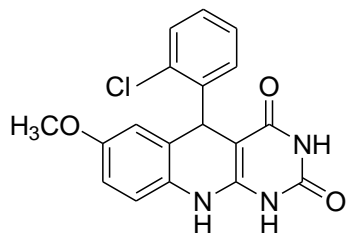

Pink solid, mp: 180-184°C. IR (KBr) ( $\nu_{\max}$ /  $\text{cm}^{-1}$ ): 3418, 3325, 2925, 1725, 1619, 1501, 1463 and 1237.  $^1\text{H}$  NMR (DMSO- $d_6$ , 400 MHz):  $\delta$  (ppm): 10.48 (s, 1H, N-H), 10.34 (s, 1H, N-H), 8.77 (s, 1H, NH), 7.33-7.35 (d,  $J=8$  Hz, 1H, Ar-H), 7.12-7.20 (m, 3H, Ar-H), 6.94-6.97 (d,  $J=12$  Hz, 1H, Ar-H), 6.70-6.72 (d,  $J=8$  Hz, 2H, Ar-H), 5.53 (s, 1H).  $^{13}\text{C}$  NMR (DMSO- $d_6$ , 100 MHz):  $\delta$  (ppm): 170.2, 160.50, 155.47, 153.62, 136.63, 134.65, 130.69, 130.30, 129.83, 129.68, 128.46, 128.14, 126.43, 117.56, 116.84, 113.81, 55.62, 52.83,

**7-methoxy-5-(thiophen-2-yl)pyrimido[4,5-*b*] quinolin- 2,4 (1H, 3H, 5H, 10H) dione (4d)**

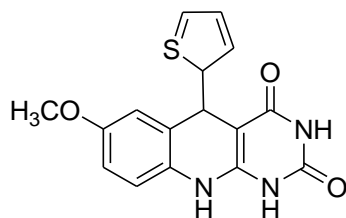

Pink solid, mp: 292-295°C. IR (KBr) ( $\nu_{\max}$ /  $\text{cm}^{-1}$ ): 3469, 3240, 3085, 2923, 2853, 1715, 1618, 1564, 1457 and 1233.  $^1\text{H}$  NMR (DMSO- $d_6$ , 400 MHz):  $\delta$  (ppm): 10.60 (s, 1H, N-H), 10.35 (s, 1H, N-H), 8.79 (s, 1H, NH), 7.17-7.18 (d,  $J=4$  Hz, 1H, Ar-H), 6.96-6.98 (d,  $J=8$  Hz, 1H, Ar-H), 6.89-6.90 (d,  $J=4$  Hz, 1H, Ar-H), 6.77-6.82 (m, 3H, Ar-H), 5.32 (s, 1H),  $^{13}\text{C}$  NMR (DMSO- $d_6$ , 100 MHz):  $\delta$  (ppm): 163.127, 155.38, 155.78, 152.39, 150.61, 148.30, 129.29, 127.06, 126.54, 124.17, 123.37, 117.33, 114.70, 113.81, 84.82, 55.66, 54.52,

**7-bromo-5-(4-hydroxy phenyl)-2-thioxo 2,3-dihydropyrimido[4,5-*b*] quinolin- 2,4 (1H, 3H, 5H, 10H) dione (4e)**

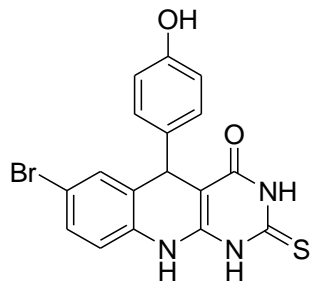

Yellow solid, mp: 330-332°C [36]. IR (KBr) ( $\nu_{\text{max}}/\text{cm}^{-1}$ ): 3443, 3217, 1689, 1653, 1517, 1443, and 1212.  $^1\text{H}$  NMR (DMSO- $d_6$ , 400 MHz):  $\delta$  (ppm): 12.34 (s, 1H, N-H), 11.55 (s, 1H, N-H), 10.98 (s, 1H, O-H), 8.36-8.38 (d,  $J=8$  Hz, 2H, Ar-H), 8.21 (s, 1H, Ar-H), 7.73-7.76 (d,  $J=8$  Hz, 1H, Ar-H), 6.90-6.92 (d,  $J=8$  Hz, 2H, Ar-H), 6.53-6.55 (d,  $J=8$  Hz, 1H, Ar-H), 5.83 (s, 1H).

**5-(anthracene-10-yl)-7-methoxy-2-thioxo-2,3-dihydropyrimido[4,5-*b*] quinolin-4(1H, 5H, 10H) one (4f)**

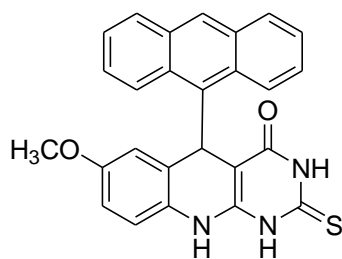

Pink solid, mp: 375-380°C [24]. IR (KBr) ( $\nu_{\text{max}}/\text{cm}^{-1}$ ): 3426, 3129, 2920, 1673, 1539, 1443, and 1314.  $^1\text{H}$  NMR (DMSO- $d_6$ , 400 MHz):  $\delta$  (ppm): 12.59 (s, 1H, N-H), 12.19 (s, 1H, N-H), 9.0 (s, 1H, Ar-H), 8.66 (s, 1H, Ar-H), 8.11-8.13 (d,  $J=8$  Hz, 3H, Ar-H), 7.96-7.98 (d,  $J=8$  Hz, 3H, Ar-H), 7.47-7.55 (m, 6H, Ar-H), 3.34 (s, 3H,  $\text{CH}_3$ ).

**7-methoxy-5-(2-nitrophenyl)pyrimido[4,5-*b*] quinolin-2,4(1H, 3H, 5H, 10H) dione (4g)**

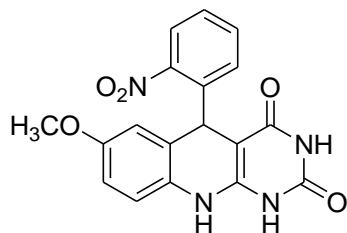

white solid, mp: 187-190°C [24]. IR (KBr) ( $\nu_{\max}$ /  $\text{cm}^{-1}$ ): 3517, 3318, 2999, 1655, 1618, 1519 and 1346.  $^1\text{H}$  NMR (DMSO- $d_6$ , 400 MHz):  $\delta$  (ppm): 10.46 (s, 1H, N-H), 10.40 (s, 1H, N-H), 8.87 (s, 1H, NH), 7.72-7.74 (d,  $J=8$  Hz), 7.50-7.54 (t,  $J=8$  Hz, 1H, Ar-H), 7.30-7.34 (t,  $J=8$  Hz, 1H, Ar-H), 7.22-7.24 (d,  $J=8$  Hz), 2H, Ar-H), 7.05-7.07 (d, 1H, Ar-H), 6.78-6.80 (d,  $J=8$  Hz, 1H, Ar-H), 5.64 (s, 1H), 3.61 (s, 3H,  $\text{CH}_3$ ).

**7-methoxy-5-(2,6-dichlorophenyl)pyrimido[4,5-*b*]quinolin-2,4 (1H, 3H, 5H, 10H) dione (4h)**

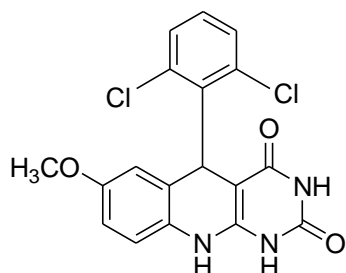

Pink solid, mp: 181-183°C [24]. IR (KBr) ( $\nu_{\max}$ /  $\text{cm}^{-1}$ ): 3347, 3073, 3000, 2930, 1695, 1643, 1561, 1463, and 1236.  $^1\text{H}$  NMR (DMSO- $d_6$ , 400 MHz):  $\delta$  (ppm): 10.37 (s, 1H, N-H), 10.25 (s, 1H, N-H), 8.83 (s, 1H, NH), 7.45-7.47 (d,  $J=8$  Hz, 1H, Ar-H), 7.20-7.25 (m, 2H, Ar-H), 7.16-7.18 (d, 1H,  $J=8$  Hz, 1H, Ar-H), 6.88-6.90 (d,  $J=8$  Hz, 1H, Ar-H), 6.71-6.73 (d,  $J=8$  Hz, 1H, Ar-H), 6.27 (s, 1H, Ar-H), 6.05 (s, 1H).

**5-(2,4-dihydroxy phenyl)pyrimido[4,5-*b*]quinolin-2,4 (1H, 3H, 5H, 10H) dione (4i)**

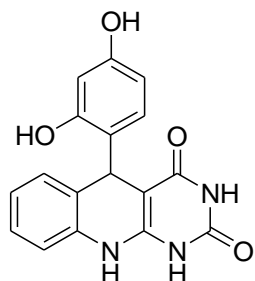

Yellow solid, mp: 200-204°C [37]. IR (KBr) ( $\nu_{\max}$ /  $\text{cm}^{-1}$ ): 3384, 3169, 3002, 2923, 1726, 1646, 1507, 1445, and 1241.  $^1\text{H}$  NMR (DMSO- $d_6$ , 400 MHz):  $\delta$  (ppm): 10.91 (s, 1H, N-H), 9.70 (s, 1H, N-H), 6.38-6.98 (m, 8H, Ar-H), 4.88 (s, 1H, O-H), 4.63 (s, 1H),

**5-(4-methyl phenyl)pyrimido[4,5-*b*]quinolin-2,4 (1H, 3H, 5H, 10H) dione (4j)**

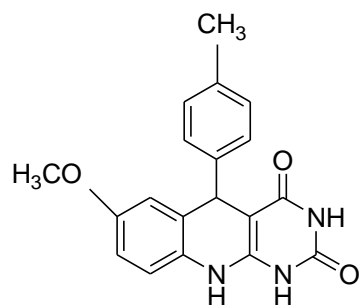

White solid, mp: 264-268°C [36]. IR (KBr) ( $\nu_{\text{max}}/\text{cm}^{-1}$ ): 3273, 3193, 1721, 1668, 1534, 1409, 1288 and 1185.  $^1\text{H}$  NMR (DMSO- $d_6$ , 400 MHz):  $\delta$  (ppm): 11.24 (s, 1H, N-H), 11.11 (s, 1H, N-H), 10.79 (s, 1H, NH), 8.30-8.33 (m, 3H, Ar-H), 8.19 (s, 1H, Ar-H), 6.85-6.87 (d,  $J = 8$  Hz, 3H, Ar-H), 5.81 (s, 1H), 2.63 (s, 3H,  $\text{CH}_3$ ).

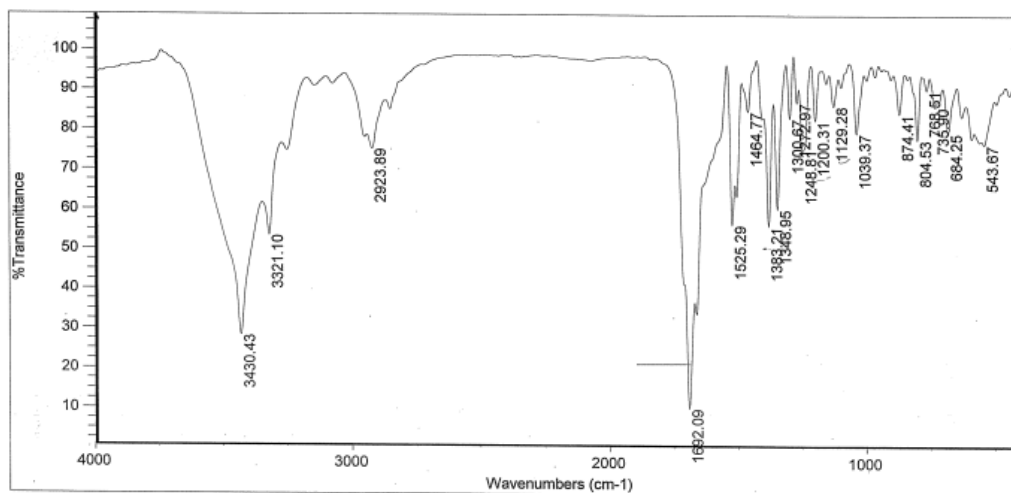

FTIR of 4a

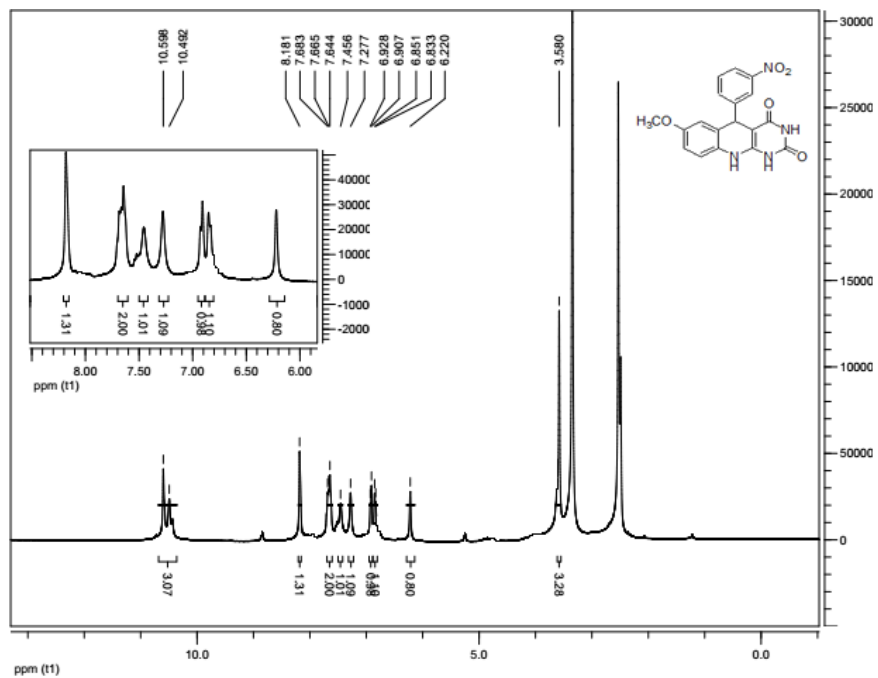

<sup>1</sup>H NMR of 4a

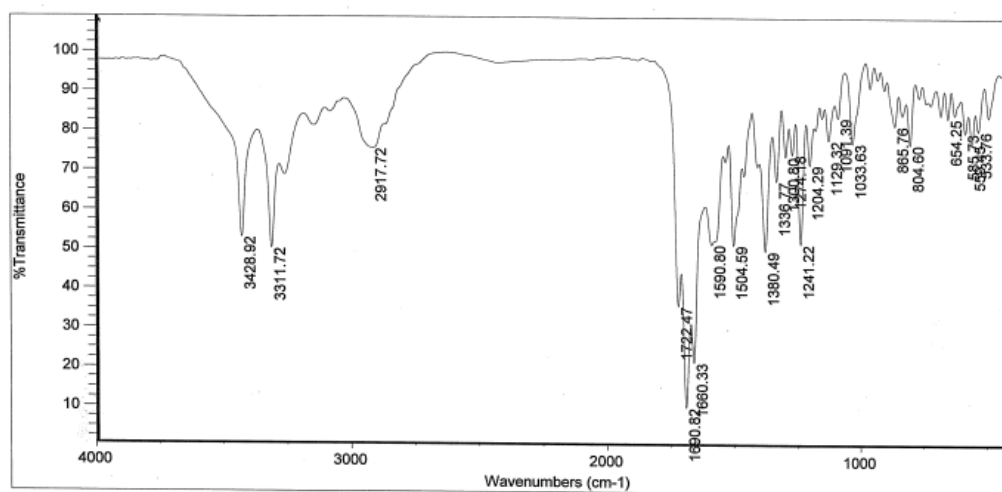

FTIR of 4b

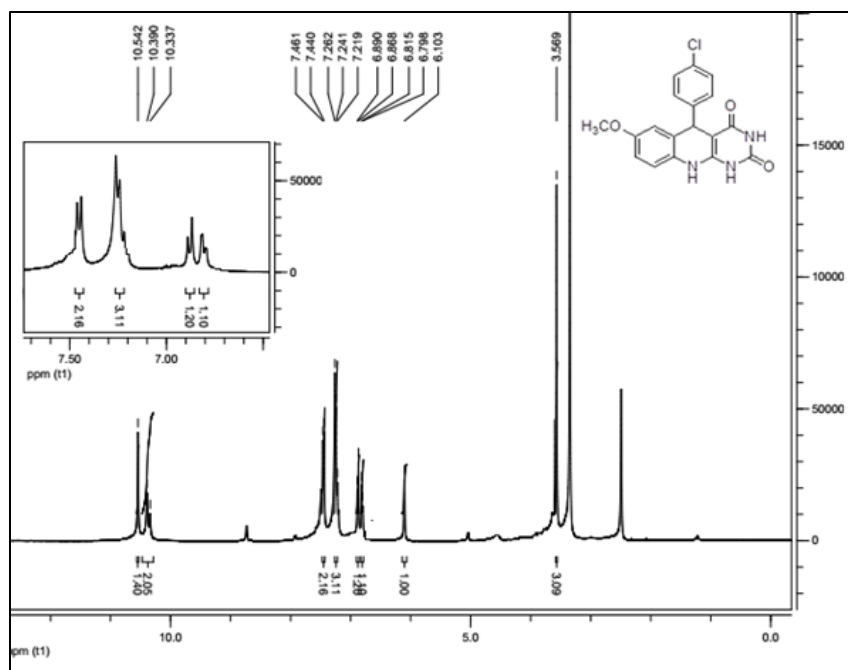

<sup>1</sup>H NMR of 4b

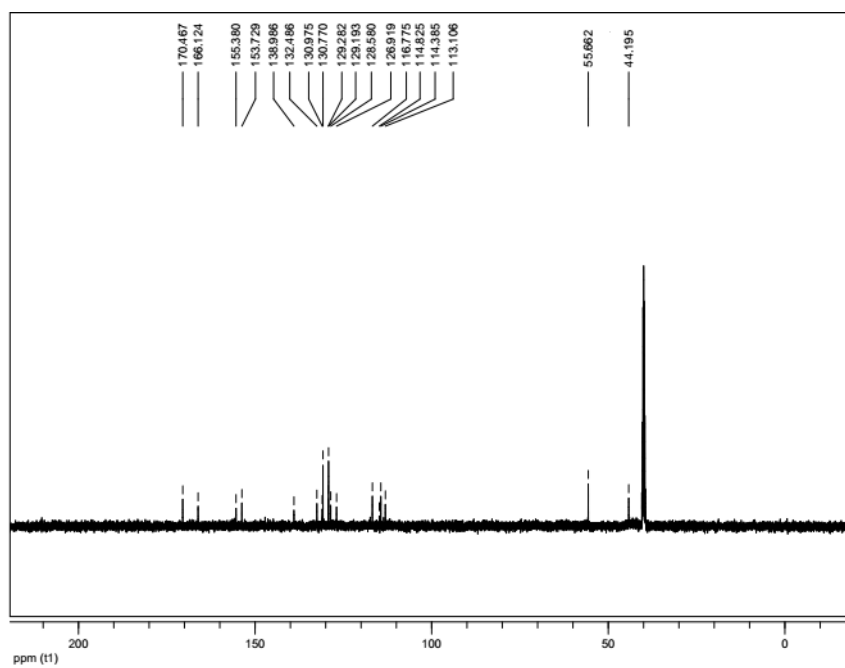

<sup>13</sup>C NMR of 4b

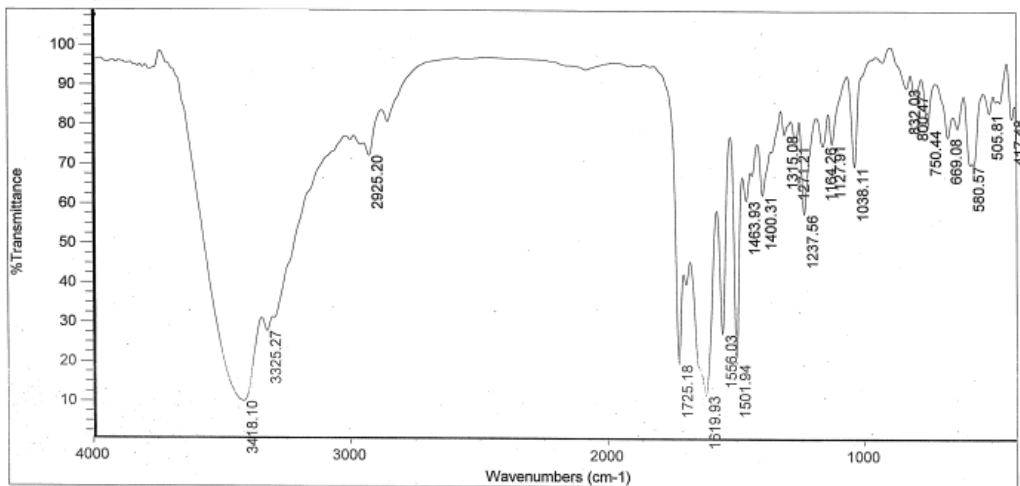

FTIR of 4c

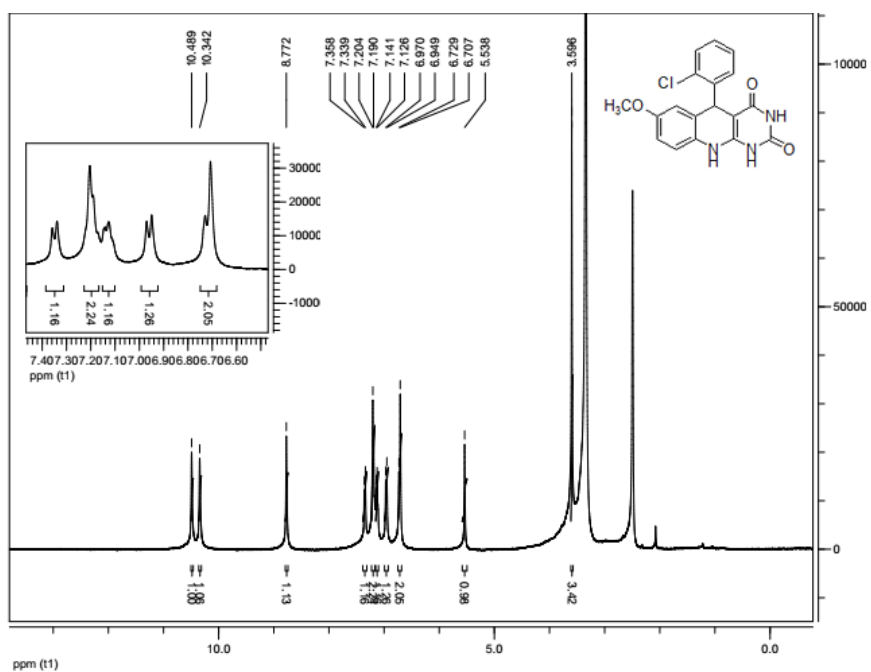

<sup>1</sup>H NMR of 4c



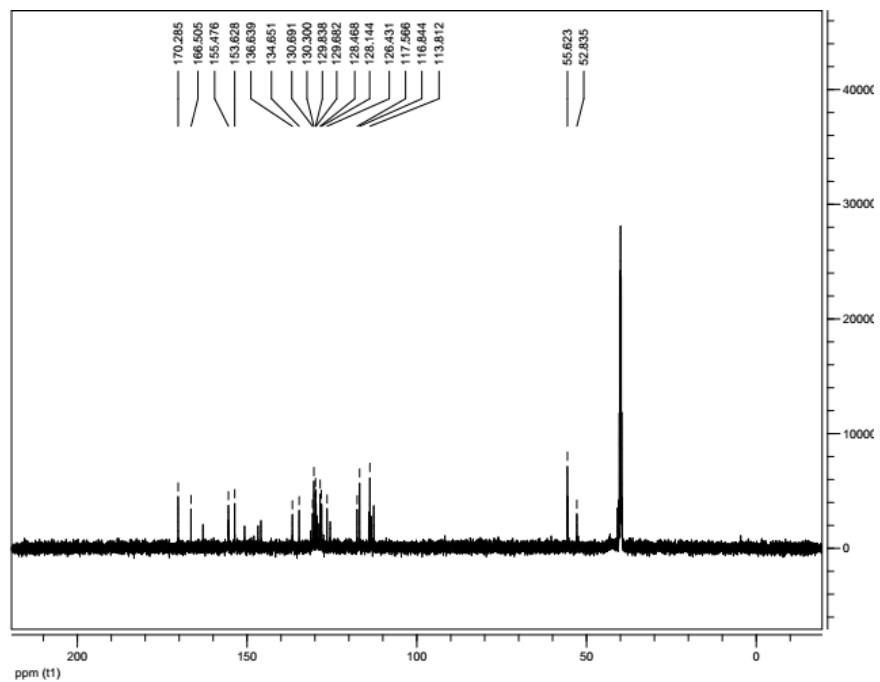

$^{13}\text{C}$ NMR of 4c

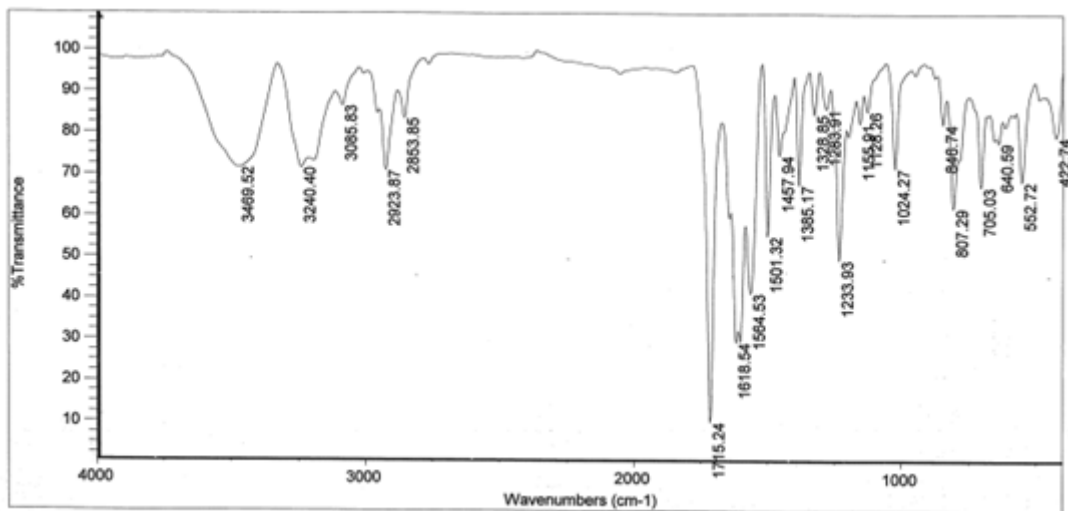

FTIR of 4d

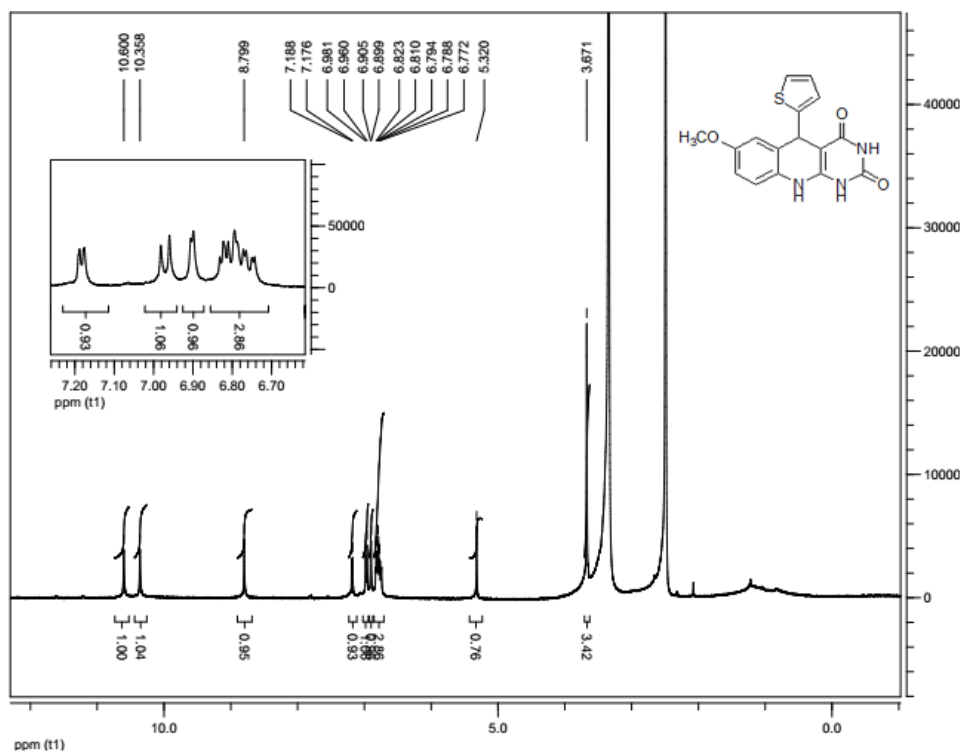

$^1\text{H NMR}$  of 4d

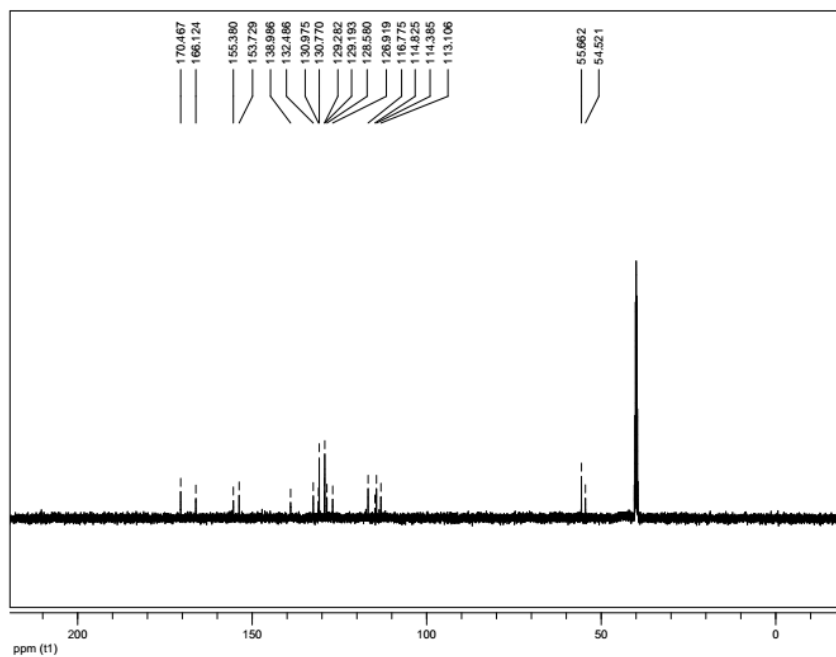

$^{13}\text{C NMR}$  of 4d

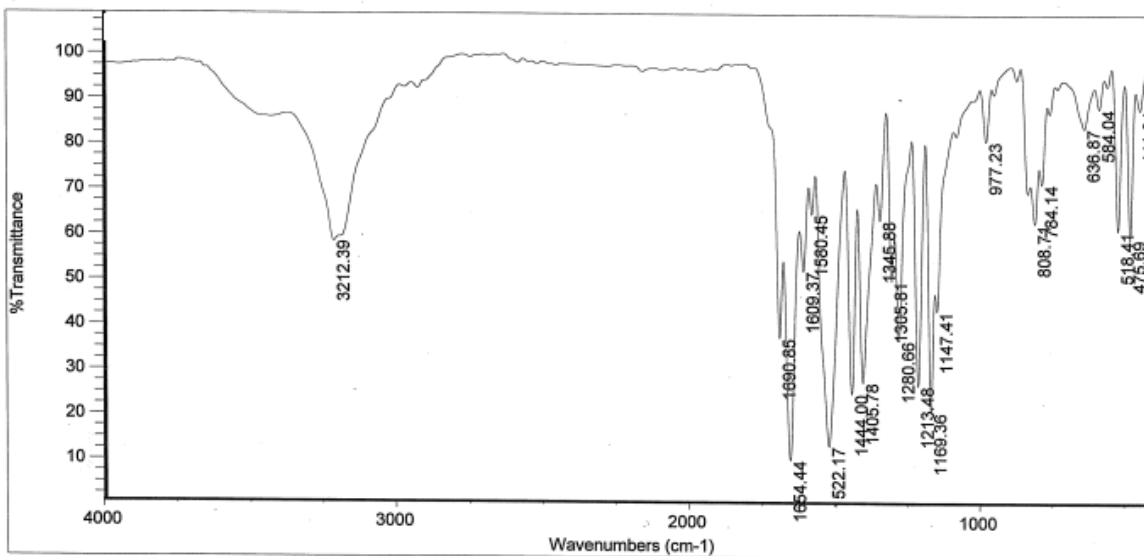

FTIR of 4e

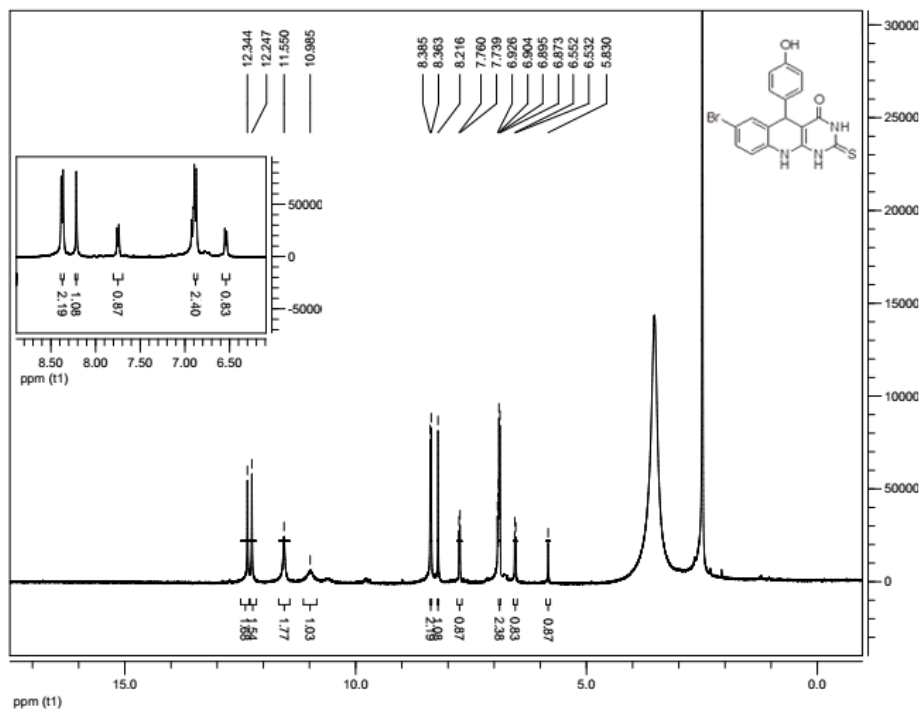

<sup>1</sup>H NMR of 4e

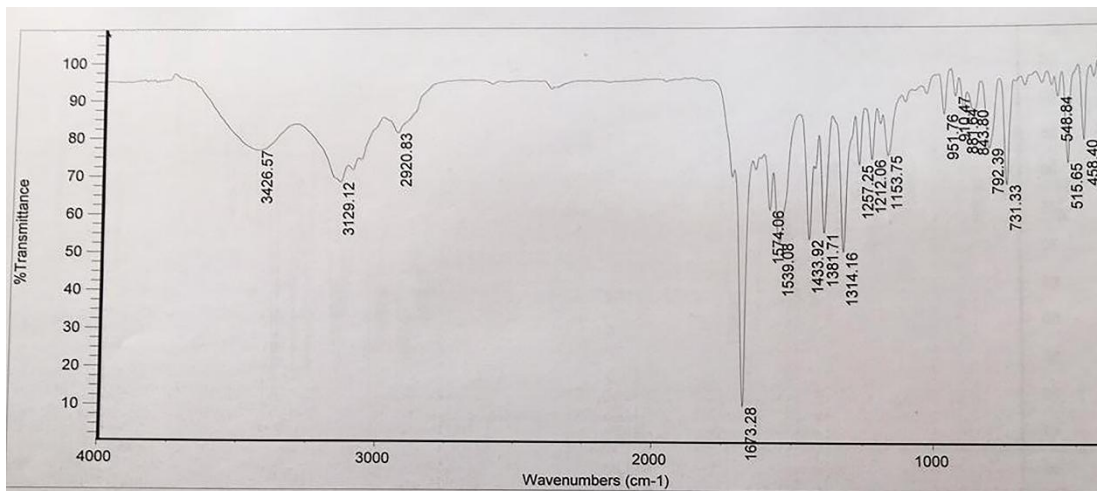

FTIR of 4f

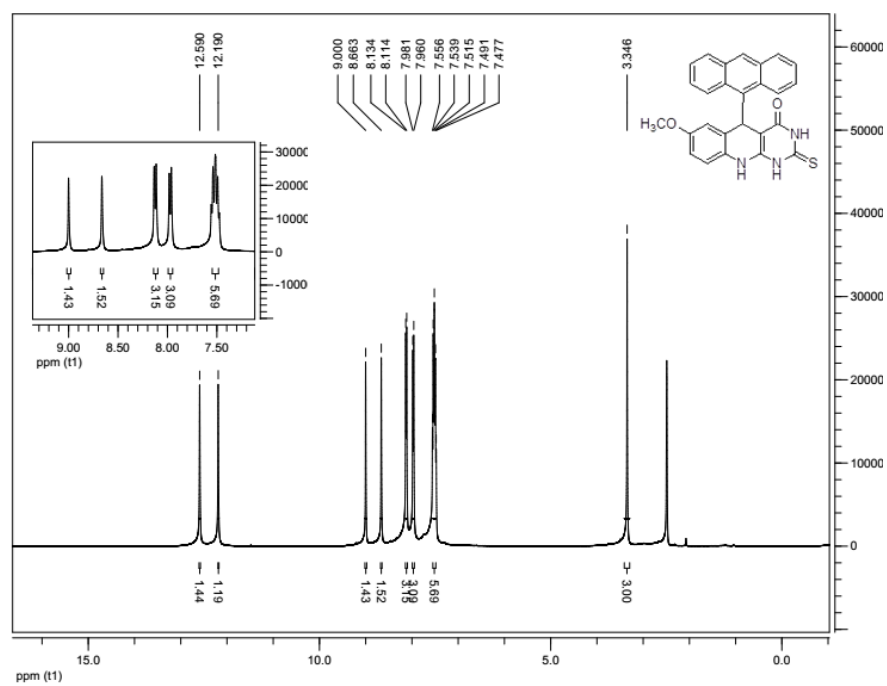

<sup>1</sup>H NMR of 4f

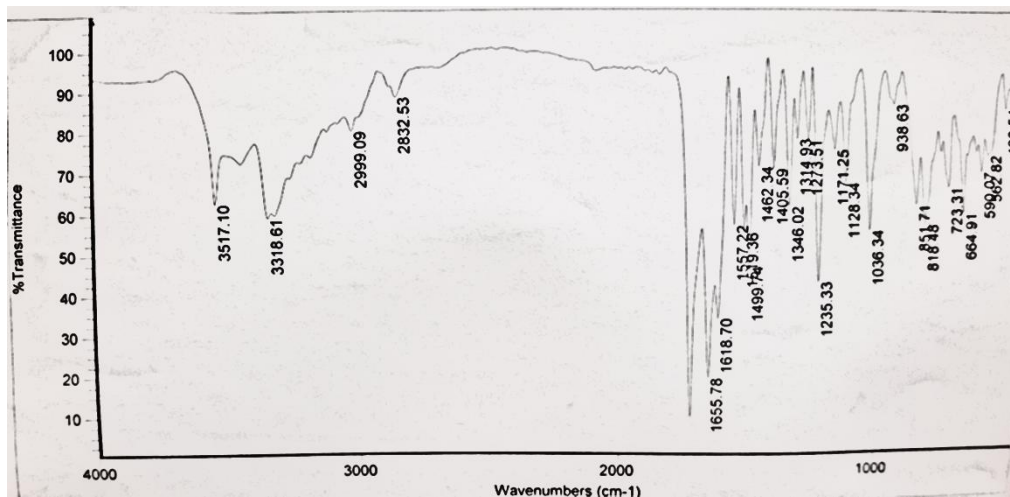

FTIR of 4g

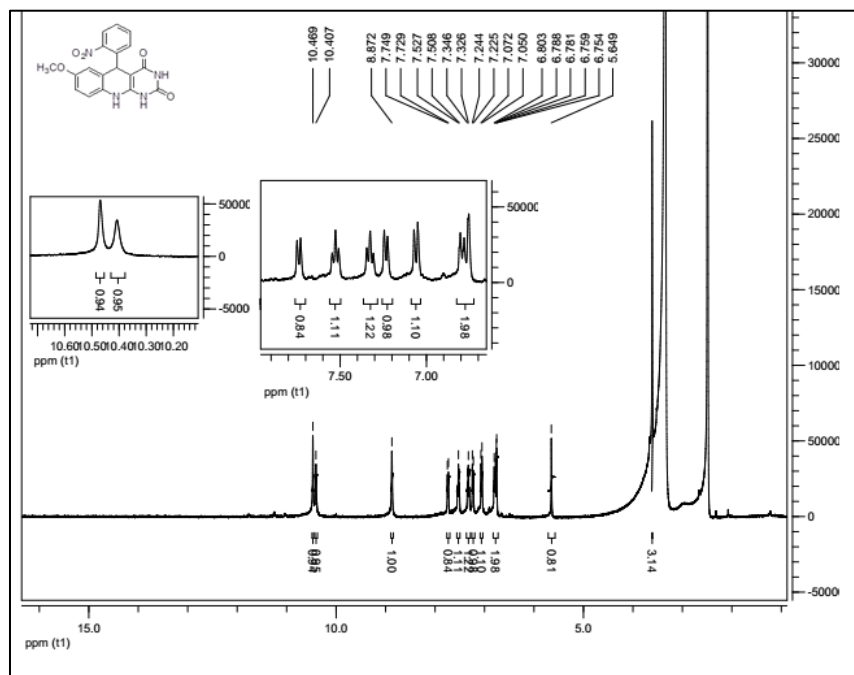

<sup>1</sup>H NMR of 4g

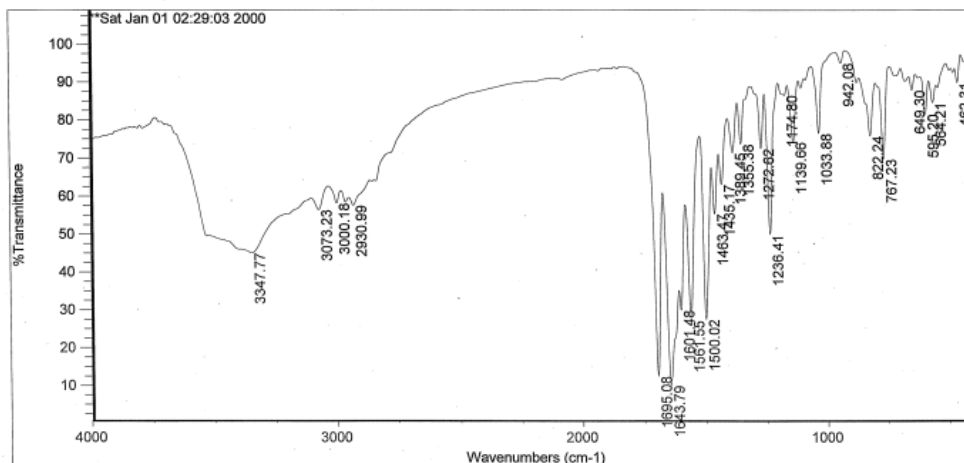

FTIR of 4h

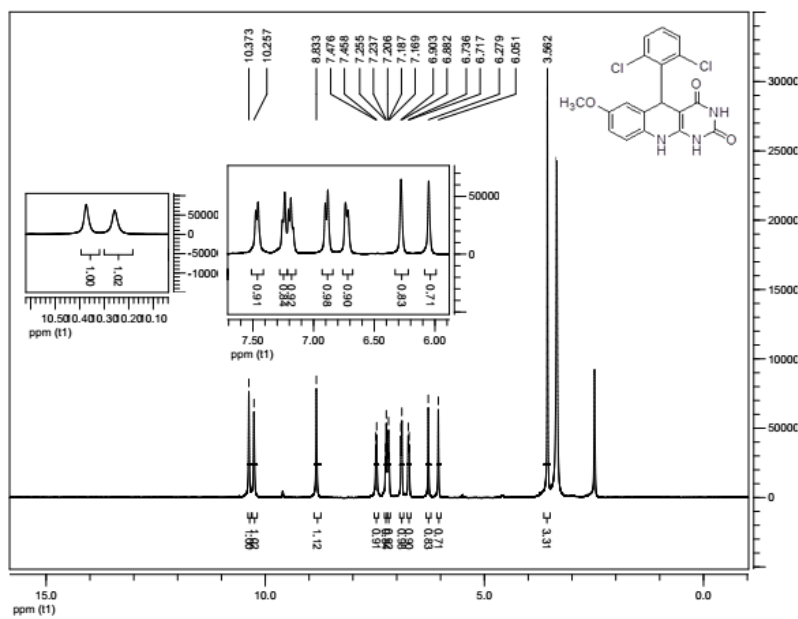

<sup>1</sup>H NMR of 4h

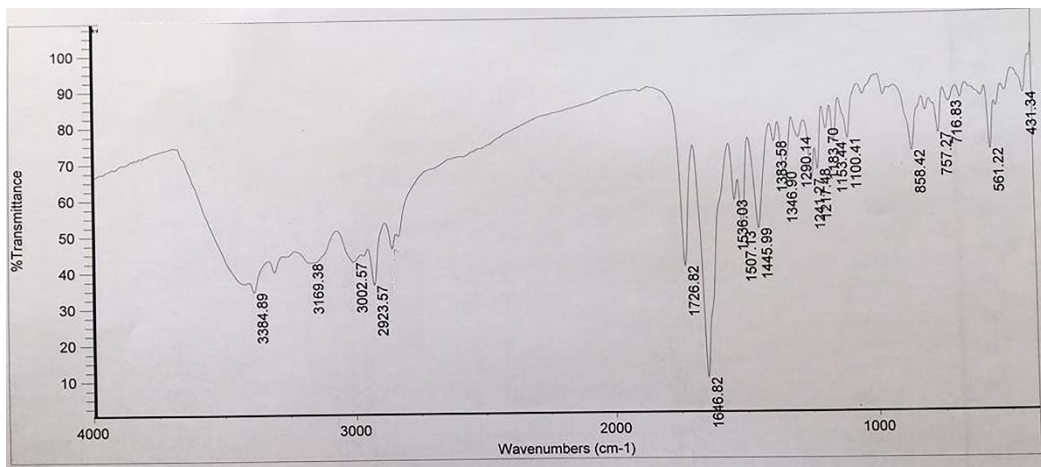

FTIR of 4i

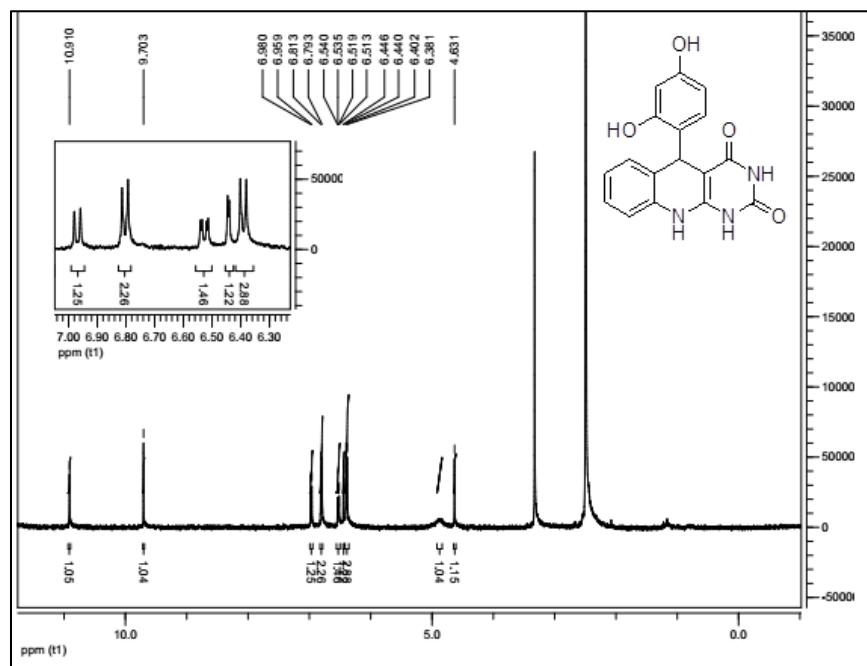

<sup>1</sup>H NMR of 4i

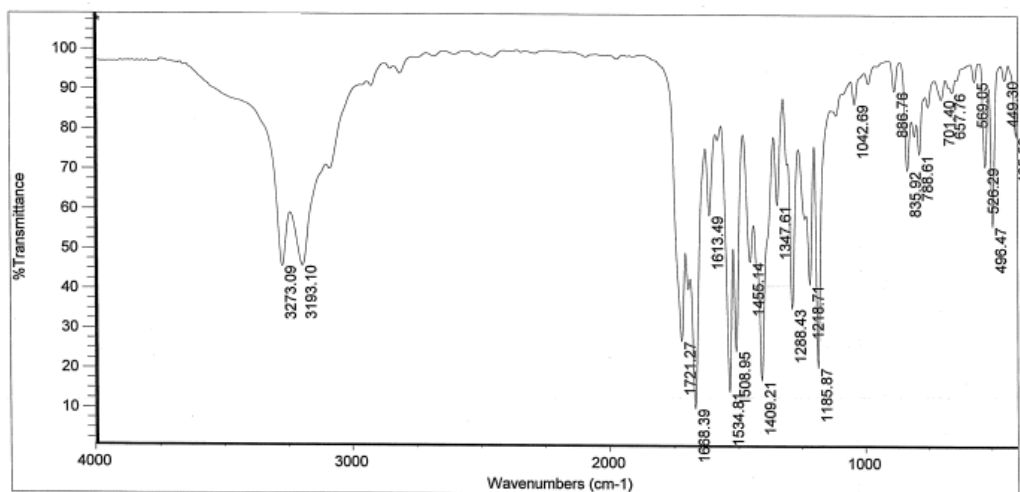

FTIR of 4j

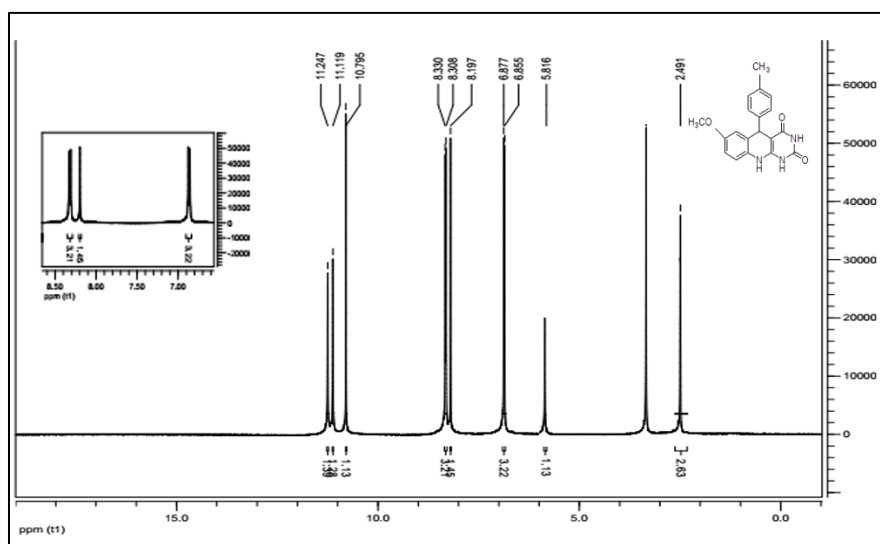

<sup>1</sup>H NMR of 4j
